# Supplementary material for: Structural, optical and photocatalytic properties of erbium (Er3+) and yttrium (Y3+) doped TiO2 thin films with remarkable self-cleaning super-hydrophilic properties
Source: Royal Society of Chemistry journal article supplement (doi:10.1039/d0ra02242j), 2020-01-01
Supplement: d0ra02242j1.pdf [file d0ra02242j1.pdf]

## Structural, optical and photocatalytic properties of erbium ( $\text{Er}^{3+}$ ) and yttrium ( $\text{Y}^{3+}$ ) doped $\text{TiO}_2$ thin films with remarkable self-cleaning super-hydrophilic properties

Raquel da Silva Cardoso<sup>1</sup>, Suélen Maria de Amorim<sup>1</sup>, Gidiane Scaratti<sup>1</sup>, Camilla Daniela Moura-Nickel<sup>1</sup>, Rodrigo Peralta Muniz Moreira<sup>2</sup>, Gianluca Li Puma<sup>2</sup>, Regina de Fátima Peralta Muniz Moreira<sup>1\*</sup>

### Supplementary material

We have previously determined the UV-vis spectra of the  $\text{Y}^{3+}$ ,  $\text{Er}^{3+}$  and bare  $\text{TiO}_2$  samples (not shown in the manuscript) (see Fig S1).

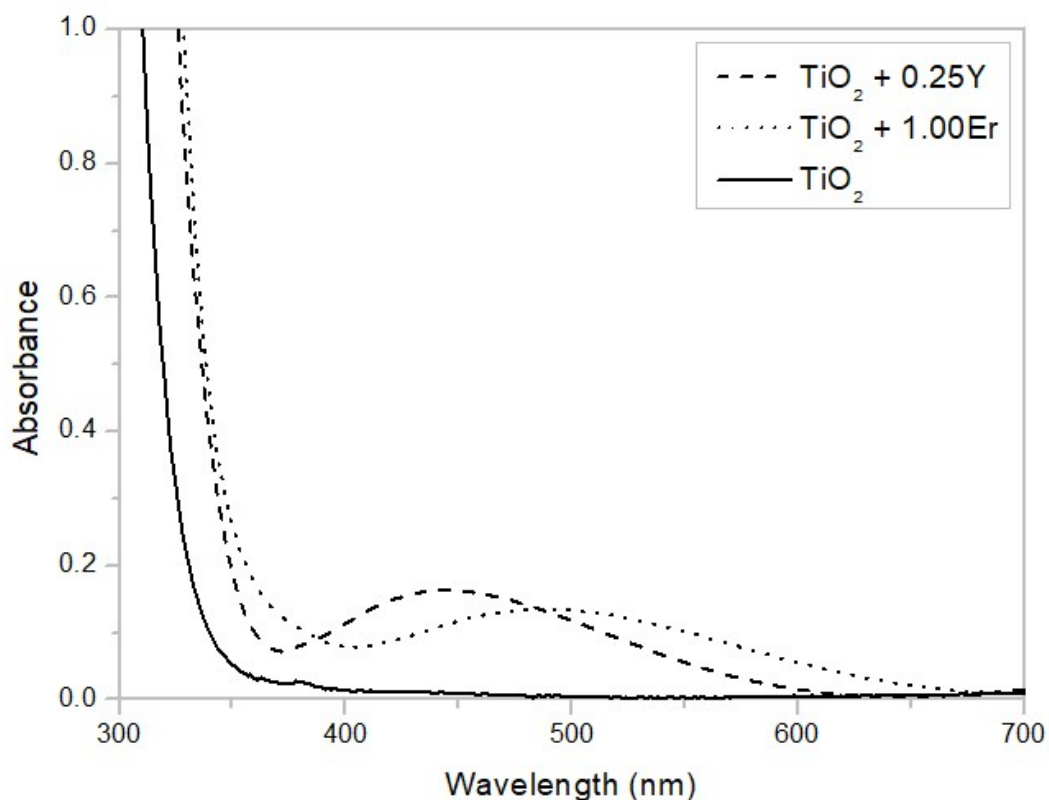

Fig S1 – UV-vis spectra of bare  $\text{TiO}_2$  and doped Y (0.25 %) and Er (1.00%)  $\text{TiO}_2$ .

The undoped  $\text{TiO}_2$  exhibited absorption only in the UV region. The absorption spectra of the doped samples showed a clear red shift compared with that of bare  $\text{TiO}_2$ , suggesting that  $\text{Y}^{3+}$  and  $\text{Er}^{3+}$  doped samples could also present visible light self-cleaning properties. The spectrum of doped  $\text{Er}^{3+}$ - $\text{TiO}_2$  showed a red shift in the band gap

transition, that has been ascribed to a charge transfer transition between  $\text{TiO}_2$  and  $\text{Er}^{3+}$  intra-4f electrons (Castañeda-Contreras et al., 2012).

The absorption edge of the sample shifts toward shorter wavelength after the Y doping. The  $\text{Y}^{3+}$  doping in  $\text{TiO}_2$  samples cause the formation of oxygen vacancies and  $\text{Ti}^{3+}$  in  $\text{TiO}_2$  (Gao et al., 2012), and  $\text{Ti}^{3+}$  results in the occupied states of Ti 3d and the up-shift of fermi level, and so the optical band gap of  $\text{TiO}_2$  is broadened (Zhang et al., 2011).

However, from our best understanding, although it is an important result, no additional evidence can be deduced from these results to further demonstrate the self-cleaning and photocatalytic activity under UVA irradiation, according to the ISO 27488 test.

J.Castañeda-Contreras· V.F.Marañón-Ruiz, R.Chiu-Zárate, H.Pérez-Ladrón de Guevara, R.Rodríguez· C.Michel-Urbe, *Materials Research Bulletin*, 2012, **47**, 290-295.

H. Zhang, K. Tan, H. Zheng, Y. Gu, W.F. Zhang, *Materials Chemistry and Physics*, 2011, **125**, 156-160.
